# Supplementary material for: High dielectric constant rutile–polystyrene composite with enhanced percolative threshold
Source: Royal Society of Chemistry journal article supplement (doi:10.1039/c2tc00042c), 2012-10-22
Supplement: c2tc00042c.pdf [file c2tc00042c.pdf]

## SUPPORTING INFORMATION

# High Dielectric Rutile-Polystyrene Composite with Enhanced Percolative Threshold

*Maurizio Crippa<sup>a\*</sup>, Alberto Bianchi<sup>a</sup>, Massimiliano D'Arienzo<sup>a</sup>, Franco Merletti<sup>a</sup>, Davide Cristofori<sup>b</sup>, Franca Morazzoni<sup>a</sup>, Roberto Scotti<sup>a</sup> and Roberto Simonutti<sup>a</sup>*

<sup>a</sup> Department of Materials Science, University of Milano Bicocca, Via R. Cozzi 53, Milano, I-20125, Italy

<sup>b</sup> Department of Physical Chemistry, Università Ca' Foscari Venezia, Via Torino 155/b, Venezia, I-30172, Italy

\*e-mail: [maurizio.crippa@unimib.it](mailto:maurizio.crippa@unimib.it) - Phone: ++39-02-64485027 - Fax: ++39-02-64485400

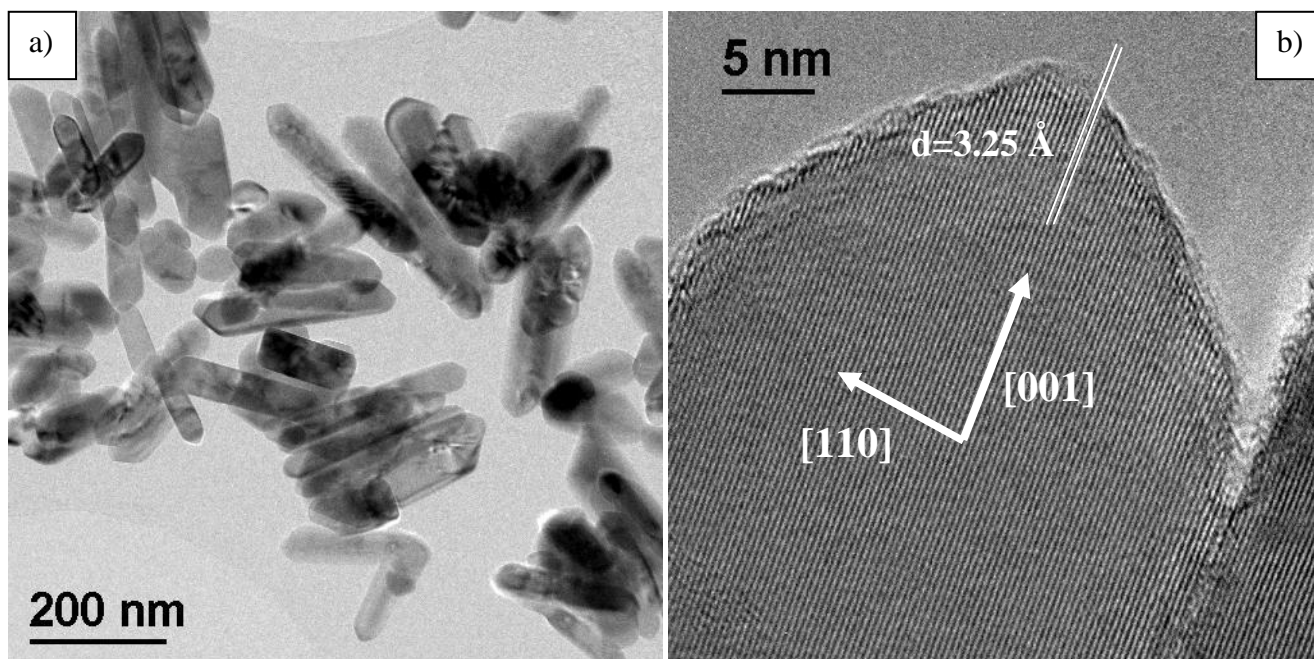

Fig. S1. TEM (a) and HRTEM (b) images of hydrothermally obtained rutile nanocrystals.

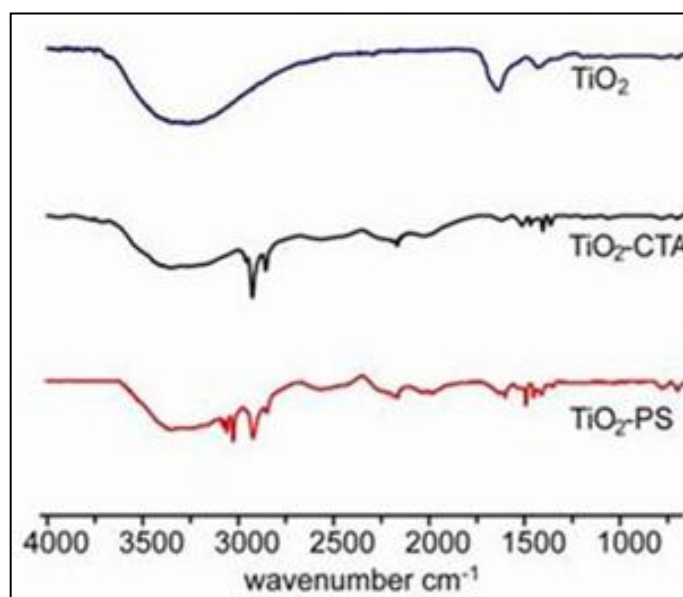

Fig. S2. FT-IR spectra of bare rutile nanoparticles, CTA grafted rutile nanoparticles ( $\text{TiO}_2\text{-CTA}$ ) and PS grafted rutile nanoparticles ( $\text{TiO}_2\text{-PS}$ )

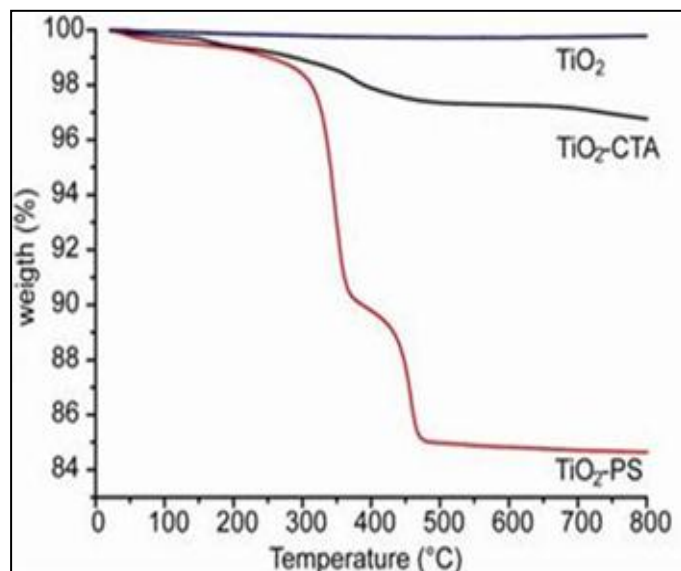

Fig. S3. TGA curves of bare rutile nanoparticles, CTA grafted rutile nanoparticles (TiO<sub>2</sub>-CTA) and PS grafted rutile nanoparticles (TiO<sub>2</sub>-PS)

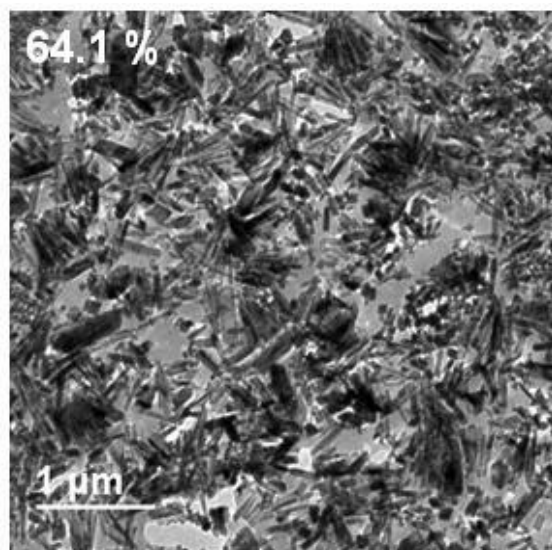

Fig.S4. TEM image of the TiO<sub>2</sub> PS composite with a 64.1% vol:vol of TiO<sub>2</sub>.

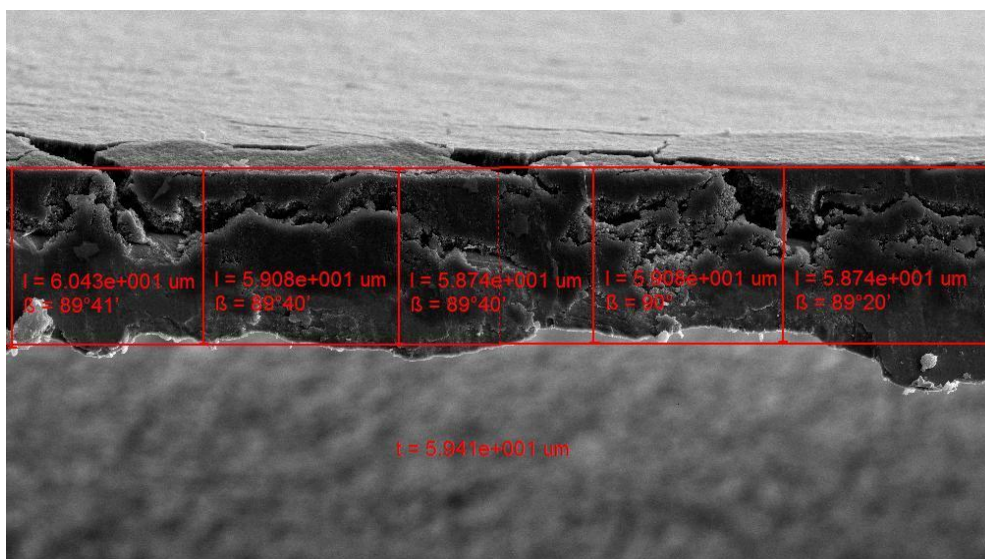

Fig.S5. SEM cross section of the TiO<sub>2</sub>-PS composite film (36.9 % TiO<sub>2</sub>) used for electric measurements

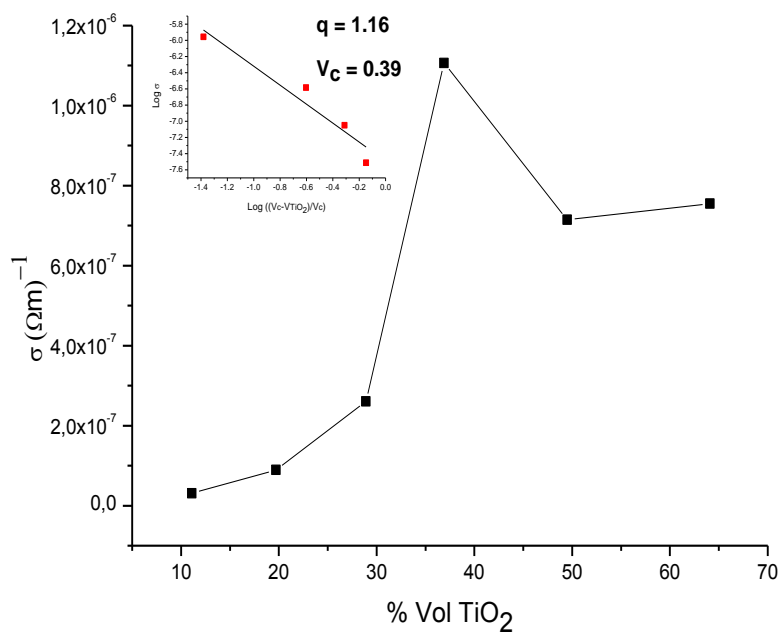

Fig. S6. Variation of the conductivity of TiO<sub>2</sub>-PS composite vs. the volume fraction of TiO<sub>2</sub> at 10<sup>4</sup>Hz. The inset shows the fitting of the  $\sigma$  to the Eq.1 using  $q$ ,  $v_c$  and  $c$  as adjustable parameters.

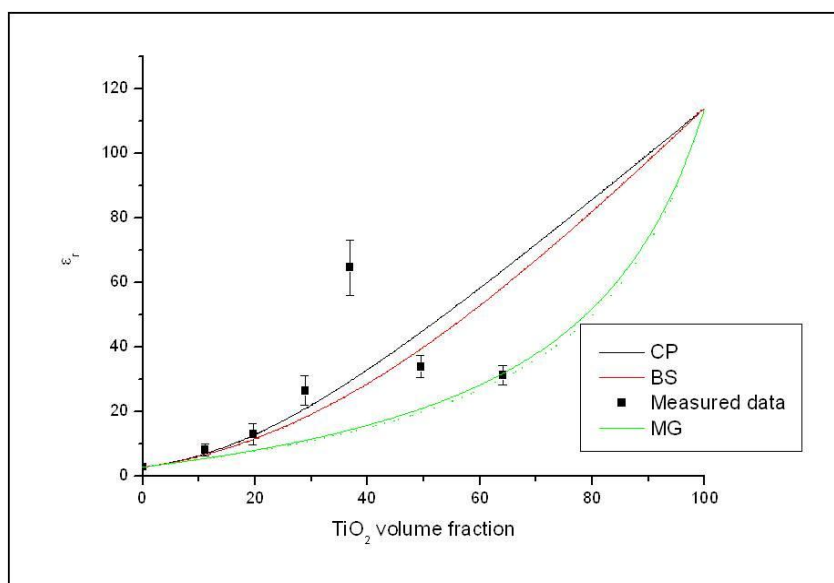

Fig. S7. Experimental values of the dielectric constant of TiO<sub>2</sub>-PS composites at different filler loading. Curves represent the best fit according the mixing formulae in reference [19].

| TiO <sub>2</sub> -PS [mg] | PS Mi14 [mg] | TiO <sub>2</sub> % vol. | PS % vol. |
|---------------------------|--------------|-------------------------|-----------|
| 230                       | 0            | 64.1                    | 35.9      |
| 180                       | 18           | 49.5                    | 50.5      |
| 135                       | 34           | 36.9                    | 63.1      |
| 95                        | 48           | 28.9                    | 71.1      |
| 65                        | 59           | 19.7                    | 80.3      |
| 35                        | 70           | 11.1                    | 88.9      |

Table S1. Amounts of TiO<sub>2</sub>-PS and commercial PS used to prepare composites at different concentration. The relative volume fractions are calculated using 1.04 g/cm<sup>3</sup> and 4.17 g/cm<sup>3</sup> as PS and TiO<sub>2</sub> density, respectively.
